# Supplementary material for: New-onset type 1 diabetes in Finnish children during the COVID-19 pandemic
Source: HighWire-hosted journal article supplement (doi:10.1136/archdischild-2020-321220), 2021-05-27
Supplement: archdischild-2020-321220supp001_data_supplement.pdf [file archdischild-2020-321220supp001_data_supplement.pdf]

**SUPPLEMENTARY MATERIAL****New-onset type 1 diabetes in Finnish children during the COVID-19 pandemic**

Heli Salmi \*, MD, PhD (1, 2); Santtu Heinonen \*, MD, PhD (1); Johanna Hästbacka, MD, PhD (1, 2);

Mitja Lääperi, MSc (1); Paula Rautiainen, MD, PhD (2); Päivi J. Miettinen, MD, PhD (1); Olli

Vapalahti, MD, PhD (3, 4, 5); Jussi Hepojoki, PhD; (3, 6); Mikael Knip, MD, PhD (1, 7)

\*equal contribution

- (1) New Children's Hospital, Pediatric Research Center, University of Helsinki, and Helsinki University Hospital; Stenbäckinkatu 9, 00029 HUS, Helsinki, Finland
- (2) Department of Anesthesia and Intensive Care, New Children's Hospital, University of Helsinki and Helsinki University Hospital; Stenbäckinkatu 9, 00029 HUS, Helsinki, Finland
- (3) Department of Virology, Medicum, Faculty of Medicine, University of Helsinki; Haartmaninkatu 3, 00014, Helsinki, Finland
- (4) HUSLAB, Helsinki University Hospital, Helsinki, Finland
- (5) Department of Veterinary Biosciences, Faculty of Veterinary Medicine, University of Helsinki, Helsinki, Finland
- (6) Institute of Veterinary Pathology, Vetsuisse Faculty, University of Zürich, Zürich, Switzerland
- (7) Research Program for Clinical and Molecular Metabolism, Faculty of Medicine, University of Helsinki, Helsinki, Finland

**This supplement forms part of the original submission.**

**We post it as supplied by the authors.**

## **SUPPLEMENTARY METHODS**

### **Patient selection for pediatric intensive care unit (PICU) admission**

There are no absolute admission criteria to our PICU for children who do not require invasive mechanical ventilation, vasoactive therapy or extracorporeal support; admission is based on a joint evaluation by an emergency care paediatrician and a paediatric intensivist. A child with DKA is admitted if he or she is deemed to require constant monitoring of the level of consciousness, more than 2-4 hourly blood gases or immediate central venous access. Consequently, children with severe DKA (pH <7.10), severe hyperosmolarity or altered level of consciousness will, in most cases, be admitted to PICU.

### **Laboratory tests and data extraction**

All laboratory parameters, except SARS-CoV-2 antibodies, were analysed by the Helsinki University Hospital (HUH) accredited centralized clinical laboratory HUSLAB. In 2016, the method for HbA1C measurement allowed exact measurements of values over 130 mmol/mol, whereas thereafter, they were reported as >130 mmol/mol. Thus, values exceeding 130 mmol/mol in 2016 were converted to 130 mmol/mol. Similarly, as  $\beta$ -Hydroxybutyric acid was occasionally measured using point of care test reporting values over 8 mmol/l as > 8 mmol/l, all values above 8 mmol/l were converted to 8 mmol/l. Duration of symptoms at the time of the diagnosis was categorized to the nearest entire week for up to 4 weeks, and to more than 4 weeks thereafter and cumulative incidence plots were created using survival survival and ggsurvminer packages[1,2].

**SARS-CoV-2 antibody tests**

Available serum samples were tested for the presence of IgG antibodies against SARS-CoV-2 spike protein using enzyme-linked immunosorbent assay (ELISA). SARS-CoV-2 spike protein was produced in Expi293 cells and ELISA was performed according to previously described protocols[3,4], with the exception that ELISA coating was 100 instead of 200 ng/well. The test has FDA authorization for emergency use in patient diagnostics [5]. One sample that gave a weak positive result in the ELISA test was further tested using a microneutralization assay[6].

**SUPPLEMENTARY TABLES****Supplementary table 1. Admissions to paediatric intensive care unit due to new onset T1D**

**during each study period (April 1 to October 31) 2016-2020.** As the study period was 7 months each year, yearly population sizes at risk were scaled to 7-month person times and incidence was reported as rates per 100 000 person years. For pre-pandemic period 2016-2019 all events and scaled person years were pooled together.

T1D, type 1 diabetes

CI, confidence interval

| <b>Year</b>        | <b>Events</b> | <b>Population</b> | <b>Scaled person years</b> | <b>Incidence rate per 100 000 person years (95% CI)</b> |
|--------------------|---------------|-------------------|----------------------------|---------------------------------------------------------|
| <b>2016</b>        | 6             | 370 948           | 216 386                    | 2.77 (1.25-6.17)                                        |
| <b>2017</b>        | 6             | 371 716           | 216 834                    | 2.77 (1.24-6.16)                                        |
| <b>2018</b>        | 9             | 371 223           | 216 547                    | 4.16 (2.16-7.99)                                        |
| <b>2019</b>        | 4             | 369 807           | 215 721                    | 1.85 (0.70-4.94)                                        |
| <b>2016 - 2019</b> | 25            | 1 483 694         | 865 488                    | 2.89 (1.95-4.27)                                        |
| <b>2020</b>        | 20            | 366 754           | 213 940                    | 9.35 (6.03-14.49)                                       |

**Supplementary table 2. Children registered to Finnish pediatric diabetes registry due to new onset T1D during each study period (April 1 to October 31) 2016-2020.** As the study period was 7 months each year, yearly population sizes at risk were scaled to 7-month person times and incidence was reported as rates per 100 000 person years. For pre-pandemic period 2016-2019 all events and scaled person years were pooled together.

T1D, type 1 diabetes

CI, confidence interval

| Year               | Events | Population | Scaled person years | Incidence rate per 100 000 person years (95% CI) |
|--------------------|--------|------------|---------------------|--------------------------------------------------|
| <b>2016</b>        | 58     | 253 210    | 147 706             | 39.3 (30.4-50.8)                                 |
| <b>2017</b>        | 53     | 255 533    | 149 061             | 35.6 (27.2-46.5)                                 |
| <b>2018</b>        | 58     | 257 141    | 149 999             | 38.7 (29.9-50.0)                                 |
| <b>2019</b>        | 62     | 257 958    | 150 476             | 41.2 (32.1-52.8)                                 |
| <b>2016 - 2019</b> | 231    | 1 023 842  | 597 241             | 38.7 (34.0-44.0)                                 |
| <b>2020</b>        | 84     | 257 158    | 150 009             | 56.0 (45.2-69.3)                                 |

**FIGURE LEGEND**

**Supplementary figure 1.** Cumulative incidences of T1D diagnoses and time since symptom onset for PICU admission (left panel) and patients registered to FPDR (right panel). The differences between the pre-pandemic and pandemic periods were not statistically significant (PICU cohort  $P=0.09$ ; and FPDR cohort  $P=0.29$ ).

T1D, type 1 diabetes; PICU, paediatric intensive care unit; FPDR, Finnish pediatric diabetes registry

**REFERENCES**

- 1 Albukadel K, Marcin K, Przemyslaw B, Scheipl F. Drawing Survival Curves using “ggplot2” [R package survminer version 0.4.9]. 2020.<https://CRAN.R-project.org/package=survminer>
- 2 Therneau T. A Package for Survival Analysis in R. R package version 3.2-10. 2021.<https://CRAN.R-project.org/package=survival>
- 3 Stadlbauer D, Amanat F, Chromikova V, *et al.* SARS-CoV-2 Seroconversion in Humans: A Detailed Protocol for a Serological Assay, Antigen Production, and Test Setup. *Curr Protoc Microbiol* 2020;**57**:e100.
- 4 Amanat F, Stadlbauer D, Strohmeier S, *et al.* A serological assay to detect SARS-CoV-2 seroconversion in humans. *Nat Med* 2020;**26**:1033–6.
- 5 U.S. Food and Drug Administration (FDA). Accelerated Emergency Use Authorization (EUA) Summary Covid-19 Elisa IgG Antibody Test. <https://www.fda.gov/media/137029/download> (accessed Oct, 28 2020).
- 6 Haveri A, Smura T, Kuivanen S, *et al.* Serological and molecular findings during SARS-CoV-2 infection: the first case study in Finland, January to February 2020. *Euro Surveill* 2020;**25**. doi:10.2807/1560-7917.ES.2020.25.11.2000266
